# Supplementary material for: Lip and Oral Cavity Cancer Incidence and Mortality Rates Associated with Smoking and Chewing Tobacco Use and the Human Development Index in 172 Countries Worldwide: An Ecological Study 2019–2020
Source: MDPI journal article supplement (doi:10.3390/healthcare11081063), 2023-04-07
Supplement: s1 [file s1]

Table S2. Lip and oral cavity cancer mortality.

| Country             | Rank | Mortality<br>per 100,000 | Average<br>Tobacco<br>Smoking<br>per day | Average<br>Tobacco<br>Chewing<br>% | HDI<br>value | Life<br>Expectancy<br>years | Expected<br>Years of<br>Schooling<br>years | Average<br>Years of<br>Schooling<br>years |
|---------------------|------|--------------------------|------------------------------------------|------------------------------------|--------------|-----------------------------|--------------------------------------------|-------------------------------------------|
| Papua New Guinea    | 1    | 10.6                     | 29.3                                     | 5.79                               | 0.555        | 64.5                        | 10.2                                       | 4.7                                       |
| Pakistan            | 2    | 8.2                      | 14.23                                    | 9.47                               | 0.557        | 67.3                        | 8.3                                        | 5.2                                       |
| Bangladesh          | 3    | 7.2                      | 23.51                                    | 23.68                              | 0.632        | 72.6                        | 11.6                                       | 6.2                                       |
| India               | 4    | 7.0                      | 13.05                                    | 18.75                              | 0.645        | 69.7                        | 12.2                                       | 6.5                                       |
| Sri Lanka           | 5    | 5.8                      | 15.95                                    | 9.36                               | 0.782        | 77.0                        | 14.1                                       | 10.6                                      |
| Namibia             | 6    | 4.7                      | 17.05                                    | 0.87                               | 0.646        | 63.7                        | 12.6                                       | 7.0                                       |
| Afghanistan         | 7    | 4.2                      | 9.83                                     | 5.34                               | 0.511        | 64.8                        | 10.2                                       | 3.9                                       |
| Hungary             | 8    | 4.1                      | 30.35                                    | 0.21                               | 0.854        | 76.9                        | 15.2                                       | 12.0                                      |
| Belarus             | 9    | 4.0                      | 36.9                                     | 0.25                               | 0.823        | 74.8                        | 15.4                                       | 12.3                                      |
| Polond              | 10   | 3.6                      | 28.1                                     | 0.32                               | 0.880        | 78.7                        | 16.3                                       | 12.5                                      |
| Lithuania           | 11   | 3.5                      | 29.1                                     | 0.22                               | 0.882        | 75.9                        | 16.6                                       | 13.1                                      |
| Myanmar             | 12   | 3.4                      | 24.79                                    | 10.35                              | 0.583        | 67.1                        | 10.7                                       | 5.0                                       |
| Republic of Moldova | 13   | 3.4                      | 23.92                                    | 0.25                               | 0.750        | 71.9                        | 11.5                                       | 11.7                                      |
| Slovakia            | 14   | 3.3                      | 27.1                                     | 0.22                               | 0.860        | 77.5                        | 14.5                                       | 12.7                                      |
| Romania             | 15   | 3.3                      | 30.95                                    | 0.36                               | 0.828        | 76.1                        | 14.3                                       | 11.1                                      |
| Cambodia            | 16   | 3.2                      | 22.84                                    | 7.27                               | 0.594        | 69.8                        | 11.5                                       | 5.0                                       |
| Latvia              | 17   | 3.2                      | 34.1                                     | 0.27                               | 0.866        | 75.3                        | 16.2                                       | 13.0                                      |
| Montenegro          | 18   | 3.2                      | 35.1                                     | 0.53                               | 0.829        | 76.9                        | 15.0                                       | 11.6                                      |
| Ukraine             | 19   | 3.1                      | 28.2                                     | 0.31                               | 0.779        | 72.1                        | 15.1                                       | 11.4                                      |
| Russia              | 20   | 3.0                      | 30.55                                    | 0.34                               | 0.824        | 72.6                        | 15.0                                       | 12.2                                      |
| Cape Verde          | 21   | 2.9                      | 6.19                                     | 1.54                               | 0.665        | 73.0                        | 12.7                                       | 6.3                                       |
| Laos                | 22   | 2.8                      | 28.04                                    | 3.73                               | 0.613        | 67.9                        | 11.0                                       | 5.3                                       |
| Serbia              | 23   | 2.7                      | 38.3                                     | 0.45                               | 0.806        | 76.0                        | 14.7                                       | 11.2                                      |
| Angola              | 24   | 2.6                      | 10.72                                    | 0.46                               | 0.581        | 61.2                        | 11.8                                       | 5.2                                       |
| Bhutan              | 25   | 2.6                      | 9.8                                      | 20.68                              | 0.654        | 71.8                        | 13.0                                       | 4.1                                       |
| Mali                | 26   | 2.5                      | 12.47                                    | 1.97                               | 0.434        | 59.3                        | 7.5                                        | 2.4                                       |
| Thailand            | 27   | 2.5                      | 21.64                                    | 1.77                               | 0.777        | 77.2                        | 15.0                                       | 7.9                                       |
| Turkmenistan        | 28   | 2.4                      | 12.32                                    | 0.27                               | 0.715        | 68.2                        | 11.2                                       | 10.3                                      |
| World               | 29   | 2.4                      | 19.66                                    | 4.71                               | 0.737        | 72.8                        | 12.7                                       | 8.5                                       |
| Cuba                | 30   | 2.3                      | 23.55                                    | 0.41                               | 0.783        | 78.8                        | 14.3                                       | 11.8                                      |
| Gabon               | 31   | 2.3                      | 12.72                                    | 0.39                               | 0.703        | 66.5                        | 13.0                                       | 8.7                                       |

|                               |    |     |       |       |       |      |      |      |
|-------------------------------|----|-----|-------|-------|-------|------|------|------|
| <b>Nepal</b>                  | 32 | 2.3 | 22.5  | 23.68 | 0.602 | 70.8 | 12.8 | 5.0  |
| <b>Uzbekistan</b>             | 33 | 2.3 | 13.37 | 4.39  | 0.720 | 71.7 | 12.1 | 11.8 |
| <b>Kazakhstan</b>             | 34 | 2.2 | 25.44 | 0.54  | 0.825 | 73.6 | 15.6 | 11.9 |
| <b>Kenya</b>                  | 35 | 2.2 | 10.86 | 1.28  | 0.601 | 66.7 | 11.3 | 6.6  |
| <b>Madagascar</b>             | 36 | 2.2 | 13.73 | 11.68 | 0.528 | 67.0 | 10.2 | 6.1  |
| <b>Portugal</b>               | 37 | 2.2 | 27.9  | 0.14  | 0.864 | 82.1 | 16.5 | 9.3  |
| <b>Czech</b>                  | 38 | 2.1 | 28.65 | 0.39  | 0.900 | 79.4 | 16.8 | 12.7 |
| <b>South Africa</b>           | 39 | 2.1 | 22.9  | 1.42  | 0.709 | 64.1 | 13.8 | 10.2 |
| <b>Botswana</b>               | 40 | 2.0 | 22.34 | 3.71  | 0.735 | 69.6 | 12.8 | 9.6  |
| <b>Croatia</b>                | 41 | 2.0 | 35.85 | 0.31  | 0.851 | 78.5 | 15.2 | 11.4 |
| <b>Estonia</b>                | 42 | 2.0 | 25.3  | 0.46  | 0.892 | 78.8 | 16.0 | 13.1 |
| <b>Equatorial Guinea</b>      | 43 | 2.0 | 15.0  | 0.67  | 0.592 | 58.7 | 9.7  | 5.9  |
| <b>Solomon Islands</b>        | 44 | 2.0 | 35.75 | 2.73  | 0.567 | 73.0 | 10.2 | 5.7  |
| <b>Mauricio</b>               | 45 | 2.0 | 23.3  | 2.32  | 0.804 | 75.0 | 15.1 | 9.5  |
| <b>Suriname</b>               | 46 | 2.0 | 21.52 | 0.58  | 0.738 | 71.7 | 13.2 | 9.3  |
| <b>Austria</b>                | 47 | 1.9 | 31.1  | 0.21  | 0.922 | 81.5 | 16.1 | 12.5 |
| <b>Brazil</b>                 | 48 | 1.9 | 8.88  | 0.39  | 0.765 | 75.9 | 15.4 | 8.0  |
| <b>Mauritania</b>             | 49 | 1.9 | 18.69 | 1.01  | 0.546 | 64.9 | 8.6  | 4.7  |
| <b>Uganda</b>                 | 50 | 1.9 | 9.39  | 0.79  | 0.544 | 63.4 | 11.4 | 6.2  |
| <b>Uruguay</b>                | 51 | 1.8 | 27.05 | 0.18  | 0.817 | 77.9 | 16.8 | 8.9  |
| <b>Djibouti</b>               | 52 | 1.8 | 23.86 | 1.34  | 0.524 | 67.1 | 6.8  | 4.1  |
| <b>Eritrea</b>                | 53 | 1.7 | 6.598 | 1.57  | 0.459 | 66.3 | 5.0  | 3.9  |
| <b>Fiji</b>                   | 54 | 1.7 | 28.5  | 2.53  | 0.743 | 67.4 | 14.4 | 10.9 |
| <b>Georgia</b>                | 55 | 1.7 | 29.41 | 0.33  | 0.812 | 73.8 | 15.3 | 13.1 |
| <b>South Sudan</b>            | 56 | 1.7 | 11.65 | 1.21  | 0.433 | 57.9 | 5.3  | 4.8  |
| <b>Belgium</b>                | 57 | 1.6 | 23.15 | 0.14  | 0.931 | 81.6 | 19.8 | 12.1 |
| <b>Borundi</b>                | 58 | 1.6 | 10.26 | 2.51  | 0.433 | 61.6 | 11.1 | 3.3  |
| <b>Chad</b>                   | 59 | 1.6 | 9.41  | 1.33  | 0.398 | 54.2 | 7.3  | 2.5  |
| <b>Ethiopia</b>               | 60 | 1.6 | 5.91  | 1.26  | 0.485 | 66.6 | 8.8  | 2.9  |
| <b>Niger</b>                  | 61 | 1.6 | 7.86  | 2.17  | 0.394 | 62.4 | 6.5  | 2.1  |
| <b>Qatar</b>                  | 62 | 1.6 | 12.43 | 0.65  | 0.848 | 80.2 | 12.0 | 9.7  |
| <b>Samoa</b>                  | 63 | 1.6 | 26.95 | 1.04  | 0.715 | 73.3 | 12.7 | 10.8 |
| <b>Senegal</b>                | 64 | 1.6 | 7.83  | 0.43  | 0.512 | 67.9 | 8.6  | 3.2  |
| <b>Bosnia and Herzegovina</b> | 65 | 1.5 | 37.8  | 0.49  | 0.780 | 77.4 | 13.8 | 9.8  |
| <b>Bulgaria</b>               | 66 | 1.5 | 37.5  | 0.68  | 0.816 | 75.1 | 14.4 | 11.4 |
| <b>Burkina Faso</b>           | 67 | 1.5 | 9.23  | 3.03  | 0.452 | 61.6 | 9.3  | 1.6  |

|                                 |     |     |       |      |       |      |      |      |
|---------------------------------|-----|-----|-------|------|-------|------|------|------|
| <b>France</b>                   | 68  | 1.5 | 34.1  | 0.13 | 0.901 | 82.7 | 15.6 | 11.5 |
| <b>Malaysia</b>                 | 69  | 1.5 | 21.75 | 2.27 | 0.810 | 76.2 | 13.7 | 10.4 |
| <b>Malawi</b>                   | 70  | 1.5 | 13.55 | 0.84 | 0.483 | 64.3 | 11.2 | 4.7  |
| <b>Micronesia</b>               | 71  | 1.5 | 49.3  | 7.24 | 0.620 | 67.9 | 11.5 | 7.8  |
| <b>United Kingdom</b>           | 72  | 1.5 | 19.9  | 0.15 | 0.932 | 81.3 | 17.5 | 13.2 |
| <b>St. Lucia</b>                | 73  | 1.5 | 12.23 | 0.49 | 0.759 | 76.2 | 14.0 | 8.5  |
| <b>Germany</b>                  | 74  | 1.4 | 26.45 | 0.18 | 0.947 | 81.3 | 17.0 | 14.2 |
| <b>Denmark</b>                  | 75  | 1.4 | 22.65 | 0.22 | 0.940 | 80.9 | 18.9 | 12.6 |
| <b>Spain</b>                    | 76  | 1.4 | 27.65 | 0.14 | 0.904 | 83.6 | 17.6 | 10.3 |
| <b>Indonesia</b>                | 77  | 1.4 | 30.95 | 1.22 | 0.718 | 71.7 | 13.6 | 8.2  |
| <b>Kyrgyzstan</b>               | 78  | 1.4 | 24.12 | 3.52 | 0.697 | 71.5 | 13.0 | 11.1 |
| <b>Lesotho</b>                  | 79  | 1.4 | 21.67 | 0.99 | 0.527 | 54.3 | 11.3 | 6.5  |
| <b>Malta</b>                    | 80  | 1.4 | 24.45 | 0.15 | 0.895 | 82.5 | 16.1 | 11.3 |
| <b>Mozambique</b>               | 81  | 1.4 | 14.77 | 1.78 | 0.456 | 60.9 | 10.0 | 3.5  |
| <b>Central African Republic</b> | 82  | 1.4 | 8.3   | 0.67 | 0.397 | 53.3 | 7.6  | 4.3  |
| <b>Switzerland</b>              | 83  | 1.4 | 26.35 | 0.21 | 0.955 | 83.8 | 16.3 | 13.4 |
| <b>Cameroon</b>                 | 84  | 1.3 | 8.15  | 0.92 | 0.563 | 59.3 | 12.1 | 6.3  |
| <b>Finland</b>                  | 85  | 1.3 | 21.45 | 0.25 | 0.938 | 81.9 | 19.4 | 12.8 |
| <b>Ireland</b>                  | 86  | 1.3 | 22.35 | 0.14 | 0.955 | 82.3 | 18.7 | 12.9 |
| <b>Morocco</b>                  | 87  | 1.3 | 11.78 | 1.06 | 0.686 | 76.7 | 13.7 | 5.6  |
| <b>Sudan</b>                    | 88  | 1.3 | 10.72 | 2.97 | 0.510 | 65.3 | 7.9  | 3.8  |
| <b>Tanzania</b>                 | 89  | 1.3 | 10.48 | 0.77 | 0.529 | 65.5 | 8.1  | 6.1  |
| <b>Timor-Leste</b>              | 90  | 1.3 | 34.87 | 1.82 | 0.606 | 69.5 | 12.6 | 4.8  |
| <b>Philippines</b>              | 91  | 1.2 | 24.57 | 1.69 | 0.718 | 71.2 | 13.1 | 9.4  |
| <b>Guinea-Bissau</b>            | 92  | 1.2 | 4.76  | 0.83 | 0.480 | 58.3 | 10.6 | 3.6  |
| <b>Italy</b>                    | 93  | 1.2 | 23.1  | 0.15 | 0.892 | 83.5 | 16.1 | 10.4 |
| <b>Mongolia</b>                 | 94  | 1.2 | 29.98 | 1.19 | 0.737 | 69.9 | 14.2 | 10.3 |
| <b>Sierra Leone</b>             | 95  | 1.2 | 19.17 | 1.26 | 0.452 | 54.7 | 10.2 | 3.7  |
| <b>Togo</b>                     | 96  | 1.2 | 8.13  | 0.87 | 0.515 | 61.0 | 12.7 | 4.9  |
| <b>Viet Nam</b>                 | 97  | 1.2 | 24.89 | 1.03 | 0.704 | 75.4 | 12.7 | 8.3  |
| <b>Albanian</b>                 | 98  | 1.1 | 31.7  | 0.8  | 0.795 | 78.6 | 14.7 | 10.1 |
| <b>Argentina</b>                | 99  | 1.1 | 24.4  | 0.2  | 0.845 | 76.7 | 17.7 | 10.9 |
| <b>Azerbaijan</b>               | 100 | 1.1 | 23.05 | 0.24 | 0.756 | 73.0 | 12.9 | 10.6 |
| <b>Bahamas</b>                  | 101 | 1.1 | 7.29  | 0.37 | 0.814 | 73.9 | 12.9 | 11.4 |
| <b>Barbados</b>                 | 102 | 1.1 | 9.25  | 0.34 | 0.814 | 79.2 | 15.4 | 10.6 |
| <b>Canada</b>                   | 103 | 1.1 | 17.7  | 0.8  | 0.929 | 82.4 | 16.2 | 13.4 |

|                                         |     |      |       |      |       |      |      |      |
|-----------------------------------------|-----|------|-------|------|-------|------|------|------|
| <b>Côte d'Ivoire</b>                    | 104 | 1.1  | 12.79 | 0.62 | 0.538 | 57.8 | 10.0 | 5.3  |
| <b>Slovenia</b>                         | 105 | 1.1  | 27.35 | 0.33 | 0.917 | 81.3 | 17.6 | 12.7 |
| <b>Iceland</b>                          | 106 | 1.1  | 15.45 | 0.64 | 0.949 | 83.0 | 19.1 | 12.8 |
| <b>Liberia</b>                          | 107 | 1.1  | 8.13  | 0.66 | 0.480 | 64.1 | 9.6  | 4.8  |
| <b>New Zealand</b>                      | 108 | 1.1  | 16.8  | 0.49 | 0.931 | 82.3 | 18.8 | 12.8 |
| <b>Oman</b>                             | 109 | 1.1  | 8.84  | 0.71 | 0.813 | 77.9 | 14.2 | 9.7  |
| <b>Rwanda</b>                           | 110 | 1.1  | 15.11 | 1.36 | 0.543 | 69.0 | 11.2 | 4.4  |
| <b>Syria</b>                            | 111 | 1.1  | 24.05 | 0.4  | 0.567 | 72.7 | 8.9  | 5.1  |
| <b>Sweden</b>                           | 112 | 1.1  | 13.4  | 1.05 | 0.945 | 82.8 | 19.5 | 12.5 |
| <b>Tajikistan</b>                       | 113 | 1.1  | 9.09  | 3.31 | 0.668 | 71.1 | 11.7 | 10.7 |
| <b>Trinidad and Tobago</b>              | 114 | 1.1  | 18.53 | 0.43 | 0.796 | 73.5 | 13.0 | 11.0 |
| <b>El Salvador</b>                      | 115 | 1.0  | 10.5  | 0.52 | 0.673 | 73.3 | 11.7 | 6.9  |
| <b>Greece</b>                           | 116 | 1.0  | 38.15 | 0.15 | 0.888 | 82.2 | 17.9 | 10.6 |
| <b>Guyana</b>                           | 117 | 1.0  | 14.55 | 0.42 | 0.682 | 69.9 | 11.4 | 8.5  |
| <b>Netherlands</b>                      | 118 | 1.0  | 22.7  | 0.13 | 0.944 | 82.3 | 18.5 | 12.4 |
| <b>Nigeria</b>                          | 119 | 1.0  | 4.29  | 0.39 | 0.539 | 54.7 | 10.0 | 6.7  |
| <b>Bolivarian Republic of Venezuela</b> | 120 | 1.0  | 17.25 | 1.32 | 0.711 | 72.1 | 12.8 | 10.3 |
| <b>Singapore</b>                        | 121 | 1.0  | 13.71 | 0.56 | 0.938 | 83.6 | 16.4 | 11.6 |
| <b>Saudi Arabia</b>                     | 122 | 0.97 | 12.38 | 0.65 | 0.854 | 75.1 | 16.1 | 10.2 |
| <b>Tunisia</b>                          | 123 | 0.97 | 24.05 | 2.41 | 0.740 | 76.7 | 15.1 | 7.2  |
| <b>Australia</b>                        | 124 | 0.94 | 15.4  | 0.41 | 0.944 | 83.4 | 22.0 | 12.7 |
| <b>Democratic Republic of Congo</b>     | 125 | 0.94 | 11.48 | 1.15 | 0.480 | 60.7 | 9.7  | 6.8  |
| <b>Kuwait</b>                           | 126 | 0.93 | 19.21 | 0.91 | 0.806 | 75.5 | 14.2 | 7.3  |
| <b>Norway</b>                           | 127 | 0.93 | 18.35 | 0.82 | 0.957 | 82.4 | 18.1 | 12.9 |
| <b>Japan</b>                            | 128 | 0.92 | 21.8  | 0.56 | 0.919 | 84.6 | 15.2 | 12.9 |
| <b>North Macedonia</b>                  | 129 | 0.92 | 39.05 | 0.44 | 0.774 | 75.8 | 13.6 | 9.8  |
| <b>Guinea</b>                           | 130 | 0.89 | 15.61 | 0.83 | 0.477 | 61.6 | 9.4  | 2.8  |
| <b>Haiti</b>                            | 131 | 0.88 | 6.37  | 0.41 | 0.510 | 64.0 | 9.7  | 5.6  |
| <b>Egypt</b>                            | 132 | 0.87 | 22.23 | 0.48 | 0.707 | 72.0 | 13.3 | 7.4  |
| <b>Jordan</b>                           | 133 | 0.86 | 32.4  | 1.11 | 0.729 | 74.5 | 11.4 | 10.5 |
| <b>Paraguay</b>                         | 134 | 0.86 | 16.46 | 1.3  | 0.728 | 74.3 | 12.7 | 8.5  |
| <b>Comoros</b>                          | 135 | 0.84 | 13.14 | 5.4  | 0.554 | 64.3 | 11.2 | 5.1  |
| <b>United States Of America</b>         | 136 | 0.83 | 17.6  | 2.23 | 0.926 | 78.9 | 16.3 | 13.4 |
| <b>Barhain</b>                          | 137 | 0.81 | 14.25 | 1.03 | 0.852 | 77.3 | 16.3 | 9.5  |
| <b>China</b>                            | 138 | 0.81 | 26.62 | 0.54 | 0.761 | 76.9 | 14.0 | 8.1  |

|                                 |     |      |       |      |       |      |      |      |
|---------------------------------|-----|------|-------|------|-------|------|------|------|
| <b>United Arab Emirates</b>     | 139 | 0.81 | 10.84 | 1.1  | 0.890 | 78.0 | 14.3 | 12.1 |
| <b>Eswatini</b>                 | 140 | 0.81 | 8.93  | 0.38 | 0.611 | 60.2 | 11.8 | 6.9  |
| <b>Iraq</b>                     | 141 | 0.81 | 20.56 | 0.41 | 0.674 | 70.6 | 11.3 | 7.3  |
| <b>Vanuatu</b>                  | 142 | 0.81 | 21.95 | 3.21 | 0.609 | 70.5 | 11.7 | 7.1  |
| <b>Benin</b>                    | 143 | 0.80 | 6.14  | 1.88 | 0.545 | 61.8 | 12.6 | 3.8  |
| <b>Peru</b>                     | 144 | 0.80 | 5.67  | 0.6  | 0.777 | 76.7 | 15.0 | 9.7  |
| <b>Guatemala</b>                | 145 | 0.78 | 12.42 | 0.28 | 0.663 | 74.3 | 10.8 | 6.6  |
| <b>Luxembourg</b>               | 146 | 0.75 | 23.75 | 0.14 | 0.916 | 82.3 | 14.3 | 12.3 |
| <b>Ghana</b>                    | 147 | 0.74 | 6.29  | 0.81 | 0.611 | 64.1 | 11.5 | 7.3  |
| <b>Colombia</b>                 | 148 | 0.72 | 12.21 | 0.58 | 0.767 | 77.3 | 14.4 | 8.5  |
| <b>Armenia</b>                  | 149 | 0.71 | 29.2  | 0.22 | 0.776 | 75.1 | 13.1 | 11.3 |
| <b>Cyprus</b>                   | 150 | 0.71 | 33.05 | 0.15 | 0.887 | 81.0 | 15.2 | 12.2 |
| <b>Turkey</b>                   | 151 | 0.71 | 30.8  | 0.36 | 0.820 | 77.7 | 16.6 | 8.1  |
| <b>Libya</b>                    | 152 | 0.70 | 20.03 | 0.83 | 0.724 | 72.9 | 12.9 | 7.6  |
| <b>Panama</b>                   | 153 | 0.68 | 8.48  | 0.37 | 0.815 | 78.5 | 12.9 | 10.2 |
| <b>Republic of Korea</b>        | 154 | 0.68 | 23.85 | 0.47 | 0.916 | 83.0 | 16.5 | 12.2 |
| <b>Islamic Republic of Iran</b> | 155 | 0.68 | 14.81 | 0.89 | 0.783 | 76.7 | 14.8 | 10.3 |
| <b>Lebanon</b>                  | 156 | 0.67 | 36.05 | 0.87 | 0.744 | 78.9 | 11.3 | 8.7  |
| <b>Ecuador</b>                  | 157 | 0.65 | 14.83 | 0.21 | 0.759 | 77.0 | 14.6 | 8.9  |
| <b>Costa Rica</b>               | 158 | 0.64 | 11.24 | 0.22 | 0.810 | 80.3 | 15.7 | 8.7  |
| <b>Chile</b>                    | 159 | 0.52 | 34.45 | 0.21 | 0.851 | 80.2 | 16.4 | 10.6 |
| <b>Mexico</b>                   | 160 | 0.52 | 18.01 | 0.39 | 0.779 | 75.1 | 14.8 | 8.8  |
| <b>Dominican Republic</b>       | 161 | 0.52 | 11.48 | 0.86 | 0.756 | 74.1 | 14.2 | 8.1  |
| <b>Honduras</b>                 | 162 | 0.48 | 14.62 | 0.37 | 0.634 | 75.3 | 10.1 | 6.6  |
| <b>Israel</b>                   | 163 | 0.47 | 20.65 | 0.19 | 0.919 | 83.0 | 16.2 | 13.0 |
| <b>Jamaica</b>                  | 164 | 0.46 | 13.46 | 0.46 | 0.734 | 74.5 | 13.1 | 9.7  |
| <b>Congo</b>                    | 165 | 0.45 | 11.25 | 0.66 | 0.574 | 64.6 | 11.7 | 6.5  |
| <b>Nicaragua</b>                | 166 | 0.43 | 13.48 | 0.65 | 0.660 | 74.5 | 12.3 | 6.9  |
| <b>Brunei Darussalam</b>        | 167 | 0.41 | 16.94 | 0.87 | 0.838 | 75.9 | 14.3 | 9.1  |
| <b>Bolivia</b>                  | 168 | 0.38 | 12.75 | 0.75 | 0.718 | 71.5 | 14.2 | 9.0  |
| <b>Algeria</b>                  | 169 | 0.37 | 17.22 | 4.01 | 0.748 | 76.9 | 14.6 | 8.0  |
| <b>Belize</b>                   | 170 | 0    | 13.31 | 0.52 | 0.716 | 74.6 | 13.1 | 9.9  |
| <b>Maldives</b>                 | 171 | 0    | 26.92 | 4.62 | 0.740 | 78.9 | 12.2 | 7.0  |
| <b>São Tomé and Príncipe</b>    | 172 | 0    | 4.75  | 0.47 | 0.625 | 70.4 | 12.7 | 6.4  |
